# American Neuropsychiatric Association

The American Neuropsychiatric Association (ANPA), established in 1988, is an organization of professionals in neuropsychiatry, behavioral neurology, neuropsychology and the clinical neurosciences. Our mission is to improve the lives of people with disorders at the interface of psychiatry and neurology.

One strength of our organization is our diverse membership, which is comprised of professionals in all areas of neuroscience who share clinical and/or academic interests in neuropsychiatry. The interdisciplinary makeup of the membership encourages collaboration among educators, clinicians, researchers, students and trainees during research presentations, symposia, workshops, and continuing education courses. *The Journal of Neuropsychiatry and Clinical Neurosciences (JNCN)* is the official publication of the organization, and a subscription is a benefit of membership.

ANPA holds an annual scientific meeting that provides the opportunity for attendees to earn continuing education and maintenance of certification credits. Members are encouraged to submit their work for presentation at our annual meetings. Travel awards are available for promising trainee clinicians and investigators. Annual meeting abstracts and proceedings are published in *JNCN*.

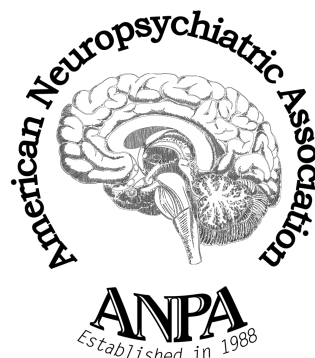

## Benefits of Membership ←

- Subscription to *The Journal of Neuropsychiatry and Clinical Neurosciences (JNCN)*
- Discounts on subscriptions to PsychiatryOnline.com including DSM Premium and DSM Premium Plus
- Opportunities for presenting at the annual meeting with accepted abstracts published in the *JNCN*
- Significantly reduced registration fees at the annual meeting
- Newsletters, news updates, information on job and training opportunities, research and meeting information on the ANPA web site: [www.anpaonline.org](http://www.anpaonline.org)
- Discounted membership and meeting registration fees for trainees and students
- Collaboration in clinical, educational and research activities with opportunities to interact with leaders in the field
- Complimentary video recordings of the annual meetings
- Access to educational slide sets assembled by the Education Committee
- Membership in Special Interest Groups (SIGs) designed to draw together ANPA members with similar clinical, research, and academic interests for the purposes of peer discussion, education, and potential collaboration

## Contact Information ←

Website: [www.anpaonline.org](http://www.anpaonline.org) • Email: [anpaoffice@gmail.com](mailto:anpaoffice@gmail.com)

## → Join ANPA Now!

## Don't miss ANPA's 29<sup>th</sup> Annual Meeting

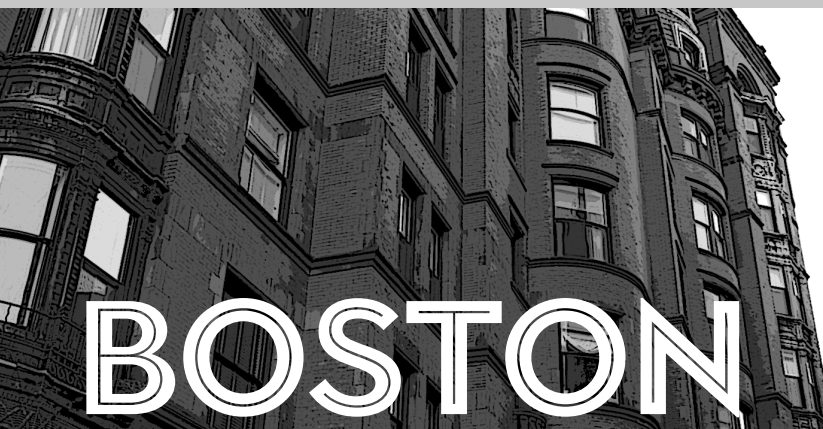

**MARCH 21-24**  
**2018**

THE WESTIN COPLEY PLACE

**SAVE**  
THE **DATE!**

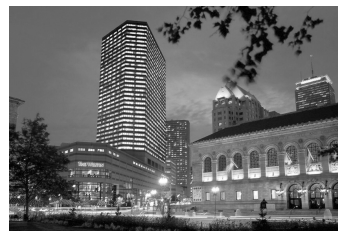

**BOSTON**  
MASSACHUSETTS - USA

Join online at: [www.anpaonline.org](http://www.anpaonline.org)

# American Neuropsychiatric Association

29<sup>th</sup> Annual Meeting

[www.anpaonline.org](http://www.anpaonline.org)

THE WESTIN  
COPLEY  
PLACE

10 HUNTINGTON AVE,  
BOSTON, MA 02116

## MEETING & ANNOUNCEMENT Call for Abstracts

You are invited to submit abstracts reporting new research or challenging clinical cases for poster or platform presentation. DEADLINE for receipt of abstracts is OCTOBER 25, 2017.

Abstracts presented at the meeting will be published online in *The Journal of Neuropsychiatry and Clinical Neurosciences*. Prior to submitting abstracts, please refer to our website for information about ANPA's award programs, platform sessions, and poster session.

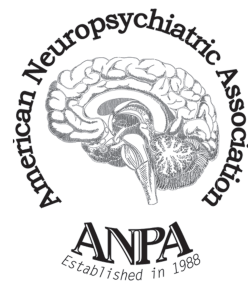

March 21-24, 2018

# BOSTON

MASSACHUSETTS - USA
