SPRING 2017 | VOLUME 29 | NUMBER 2

The Journal of  
**Neuropsychiatry**  
and Clinical Neurosciences

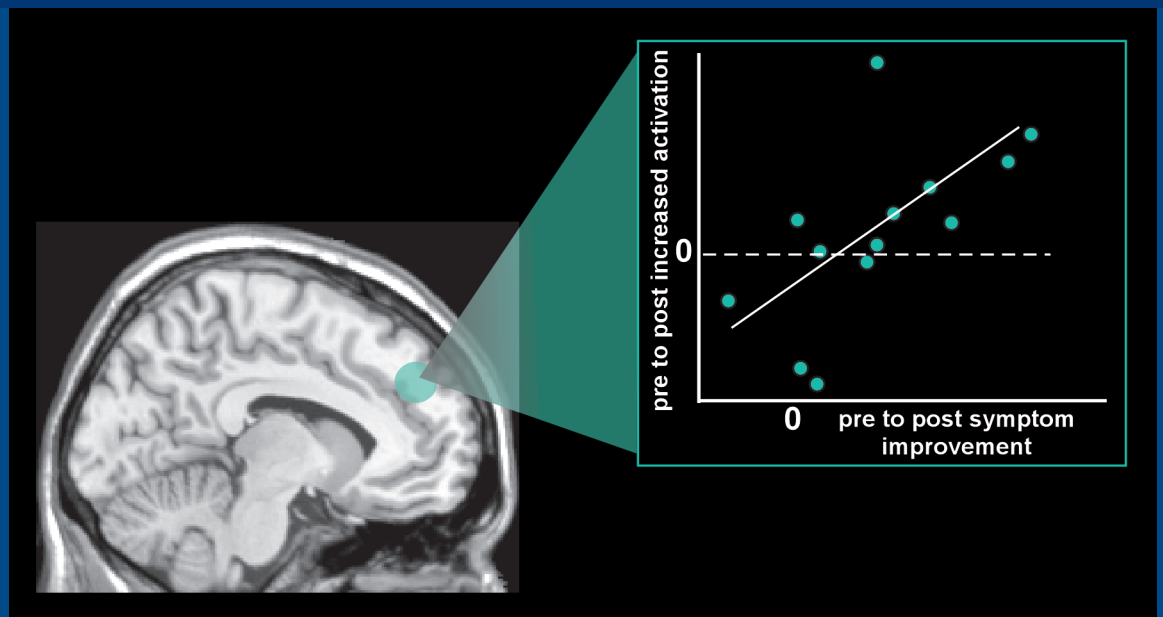

A Neurology of the Conservative-Liberal Dimension  
of Political Ideology

Secular Mindfulness-Based Interventions:  
Efficacy and Neurobiology

Neurobiology of the Premonitory Urge in  
Tourette's Syndrome

Depressive Symptoms Contribute to Executive Deficits  
in Temporal Lobe Epilepsy

High-Frequency TMS and Craving in Substance Use  
Disorder: A Meta-Analysis

Official Journal of the American Neuropsychiatric Association  
[neuro.psychiatryonline.org](http://neuro.psychiatryonline.org)
