# ASSESS FUNCTIONAL IMPAIRMENT ACROSS 6 IMPORTANT LIFE AREAS.

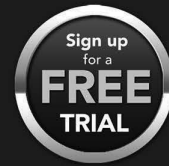

[info.mhs.com/rsi-free-trial](http://info.mhs.com/rsi-free-trial)

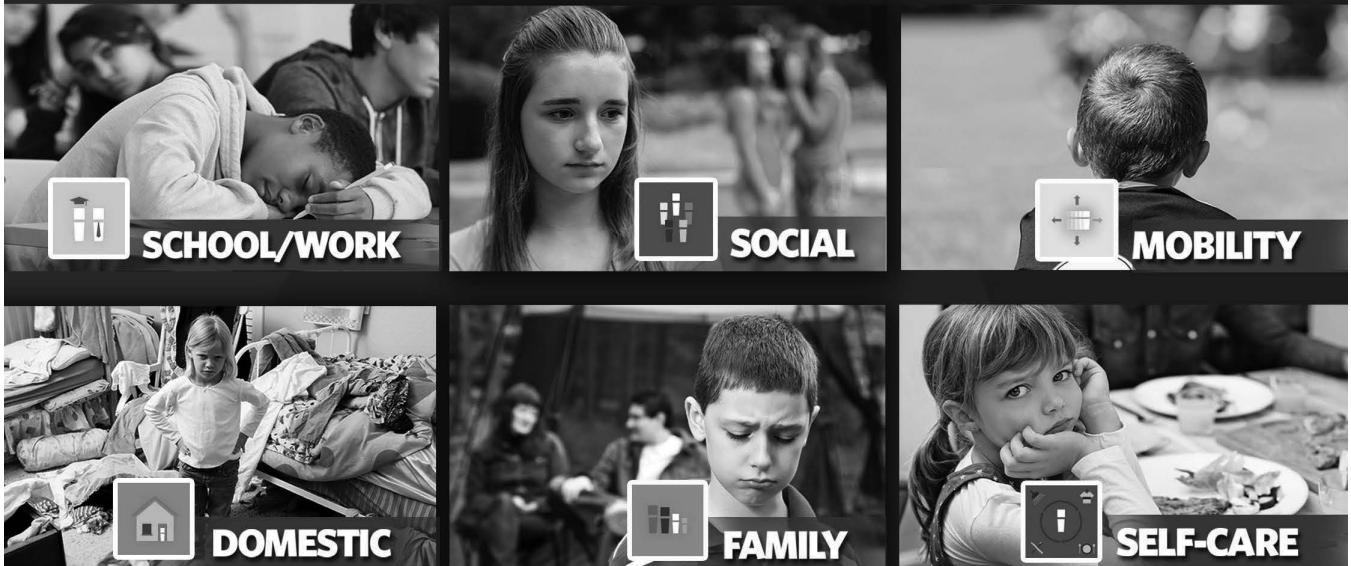

## RSI<sup>™</sup> RATING SCALE OF IMPAIRMENT<sup>™</sup>

- **Determine if DSM-5/ICD-10 impairment criteria for a diagnosis are met** by identifying specific areas where functioning is impacted
- **Develop targeted treatment plans and monitor progress** by focusing on areas with the greatest impairment
- **Determine if service eligibility requirements are met** with IDEA compatibility
- **Assess impairment more clearly** by separating functional limitations from symptoms

Learn more at [MHS.com/RSI](http://MHS.com/RSI)

**MHS**<sup>®</sup>  
ASSESSMENTS

*G&N*<sup>®</sup>  
Goldstein & Naglieri  
Exceptional In Assessments

# The Journal of Neuropsychiatry and Clinical Neurosciences

Official Journal of the American Neuropsychiatric Association

## Editorial Board

The *Journal of Neuropsychiatry and Clinical Neurosciences* (ISSN 0895-0172), is published quarterly by the American Psychiatric Association (APA), 1000 Wilson Blvd., Suite 1825, Arlington, VA 22209. Copyright © 2017 American Psychiatric Association. The *Journal of Neuropsychiatry and Clinical Neurosciences* is protected by copyright and may not be reproduced in any manner without written permission. The *Journal* is abstracted/indexed in *Chemical Abstracts*, *Current Contents/Clinical Medicine*®, *EMBASE/Excerpta Medica*, *Index Medicus/MEDLINE/MEDLARS*, *PsycINFO*, *Psychological Abstracts*, *Research Alert*®, and *Sci Search*®. It is available through University Microfilms, Inc., 300 North Zeeb Road, Ann Arbor, MI 48106, in microform, electronic, or paper format.

Manuscript submissions should no longer be sent by mail. Please visit <http://mc.manuscriptcentral.com> to upload a paper online.

U.S. individual subscriptions are \$270 per year for 4 issues (\$216 for APA members); international subscriptions are \$408 per year (\$243 for online only). APA International Members receive a 20% discount off the online only rate for an individual online subscription. Institutional subscriptions are tier priced. For institutional site license information and pricing, please email us at [appi@psych.org](mailto:appi@psych.org), call (800) 368-5777 or visit [www.appi.org/ForLibrarians/](http://www.appi.org/ForLibrarians/).

Advertising inquiries may be directed to Tim Wolfinger at PMI, 30 East 33rd St., New York, NY 10016; (212) 904-0379; [twolfinger@pminy.com](mailto:twolfinger@pminy.com).

APA is not responsible for statements made in this publication by contributors or advertisers. Unless stated, material in the *Journal of Neuropsychiatry and Clinical Neurosciences* does not reflect the endorsement, official attitude, or position of APA or the American Neuropsychiatric Association.

Periodicals postage paid at Arlington, VA, and additional mailing offices. POSTMASTER: Send address changes to the *Journal of Neuropsychiatry and Clinical Neurosciences*, 1000 Wilson Blvd., Suite 1825, Arlington, VA 22209.

### Editor

David B. Arciniegas, M.D.

### Editor Emeritus

Stuart C. Yudofsky, M.D.

### Deputy Editor

C. Alan Anderson, M.D.

### Assistant to the Editors

T. Angelita Garcia, M.B.A.

### Consulting Editors

C. Edward Coffey, M.D.  
Thomas W. McAllister, M.D.  
Henry Nasrallah, M.D.  
Fred Ovsiew, M.D.  
Jonathan M. Silver, M.D.

### Associate Editors

Sheldon Benjamin, M.D.  
Kevin J. Black, M.D.  
Nashaat N. Boutros, M.D.  
John J. Campbell, M.D.  
Miles Cunningham, M.D.  
Michael Ebert, M.D.  
Richard B. Ferrell, M.D.  
Laura A. Flashman, Ph.D.  
Yonas E. Geda, M.D.  
Daniel I. Kaufer, M.D.  
W. Curt LaFrance, M.D.  
Edward C. Lauterbach, M.D.  
Mario Mendez, M.D., Ph.D.  
Charles Nemeroff, M.D., Ph.D.  
Trevor R. P. Price, M.D.  
Robert G. Robinson, M.D.  
David A. Silbersweig, M.D.  
Robert Stern, Ph.D.  
Kaloyan S. Tanev, M.D.  
Paula T. Trzepacz, M.D.  
Hal S. Wortzel, M.D.

### Neuropsychiatry Classics Editor

Thomas C. Neylan, M.D.

### Book Review Editor

Michael Schrift, D.O., M.A.

### Windows to the Brain Editors

Robin A. Hurley, M.D.  
L. Anne Hayman, M.D.  
Katherine H. Taber, Ph.D.

### American Psychiatric Association Publishing

Rebecca D. Rinehart  
*Publisher*

Michael Roy

*Editorial Director, Journals*

Angela Moore

*Editorial Manager*

Susan Westrate

*Production Manager, Journals*

Heidi Koch

*Editorial Support Services Manager*

Patrick Hansard

*Director of Marketing and Sales*

AMERICAN  
PSYCHIATRIC  
ASSOCIATION  
PUBLISHING

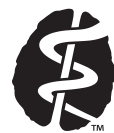

Please visit the Journal's website at [neuro.psychiatryonline.org](http://neuro.psychiatryonline.org)

## Casebook of Neuropsychiatry

Edited by Trevor A. Hurwitz, M.B., Ch.B.,  
and Warren T. Lee, M.D., Ph.D.

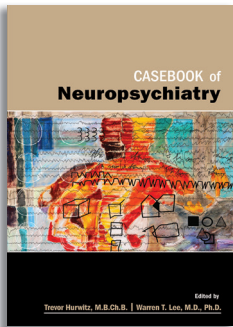

*Casebook of Neuropsychiatry* is comprised of 38 clinical cases based on real patient interactions that straddle the domains of neurology and psychiatry. The book is designed to supplement comprehensive texts by providing real-world accounts of patient presentations that clinicians are likely to encounter.

2013 • 383 pages • ISBN 978-1-58562-431-7 • Paperback  
\$83.00 • Item #62431

2013 • 383 pages • ISBN 978-1-58562-992-3 • eBook  
\$66.00 • Item #62992

AMERICAN  
PSYCHIATRIC  
ASSOCIATION  
PUBLISHING

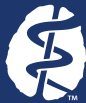

www.appi.org  
Email: appi@psych.org  
Phone: 1-800-368-5777

AH1732A

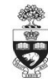

Psychiatry  
UNIVERSITY OF TORONTO

Sunnybrook Health Sciences Centre, a fully affiliated teaching site for the University of Toronto, is seeking a full-time neuropsychiatrist for its Traumatic Brain Injury Clinic. The anticipated start date is July 1, 2017.

The Traumatic Brain Injury Clinic is situated in Sunnybrook Health Sciences Centre, Canada's largest tertiary referral trauma centre, and provides behavioral assessments to patients with mild to moderate brain injuries. The Clinic's mandate is to assess and treat patients within three months of injury. Brain imaging (fMRI) and neuropsychological testing are integral to the clinic and a research component is built in to allow access to a large, longitudinal behavioral database.

The successful candidate should possess strong leadership skills with a capacity for team-building and fostering multi-disciplinary collaboration. The selected psychiatrist will be responsible for a combination of patient care and teaching of medical students, residents and fellows. He/She should be a clinician-scientist with a proven track record of independent scholarship in the neuroscience field with a focus on traumatic brain injury.

The candidate must be eligible for appointment at the rank of Assistant Professor at the University of Toronto and be eligible for certification with the Royal College of Physicians and Surgeons of Canada, and licensure with the College of Physicians and Surgeons of Ontario. Salary is commensurate with qualifications and experience.

Interested applicants should submit a letter of introduction and curriculum vitae to **Dr. Ari Zaretsky**

Psychiatrist-in-Chief, Sunnybrook Health Sciences Centre  
via email to [ari.zaretsky@sunnybrook.ca](mailto:ari.zaretsky@sunnybrook.ca) by May 26, 2017.

## Management of Adults With Traumatic Brain Injury

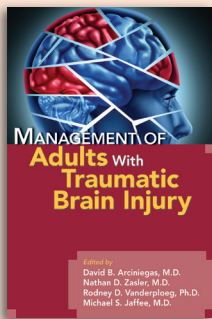

Edited by David B. Arciniegas, M.D., Nathan D. Zasler, M.D.,  
Rodney D. Vanderploeg, Ph.D., and Michael S. Jaffee, M.D.

Traumatic brain injury (TBI) is a public health issue of worldwide proportions, affecting motorists, victims of interpersonal violence, athletes, military service members, and Veterans, among others. *Management of Adults with Traumatic Brain Injury* provides evidence-informed guidance on the core topics in brain injury medicine, including the epidemiology and pathophysiology of TBI, the medical evaluation and neuropsychological assessment

of persons with TBI, and the common cognitive, emotional, behavioral, and other neurological disturbances for which persons with TBI and their families seek clinical care.

This book is a must-read for every physician, nurse, and mental health practitioner working to improve the lives of persons with TBI.

2013 • 587 pages • ISBN 978-1-58562-404-1 • Paperback • \$87.00 • Item #62404

2013 • 587 pages • ISBN 978-1-58562-988-6 • eBook • \$70.00 • Item #62988

AMERICAN  
PSYCHIATRIC  
ASSOCIATION  
PUBLISHING

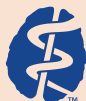

Order Online: [www.appi.org](http://www.appi.org)  
Phone: 703-907-7322  
Toll Free: 1-800-368-5777  
Email: [appi@psych.org](mailto:appi@psych.org)

20% Discount for American Psychiatric  
Association Members

25% Discount for APA Resident-Fellow Members AH1730A
